## Spatial structure of synchronized inhibition in the olfactory bulb

Hannah A. Arnson and Ben W. Strowbridge, Department of Neurosciences, Case Western Reserve University, Cleveland, Ohio USA

*Correspondence* Dr. Ben W. Strowbridge, Dept. of Neurosciences, Case Western Reserve University School of Medicine, 10900 Euclid Avenue, Cleveland, OH 44106, (216) 368-6974, Email: bens@case.edu

*Keywords* Synaptic transmission, brain slice, whole-cell patch clamp recording, synchronization, coincident inhibition

This PDF document (v 1.1) was generated using Pandoc on April 3, 2017.

### 1 **Abstract**

2 Olfactory sensory input is detected by receptor neurons in the nose which then send infor-  
3 mation to the olfactory bulb, the first brain region for processing olfactory information.  
4 Within the olfactory bulb, many local circuit interneurons, including axonless granule cells,  
5 function to facilitate fine odor discrimination. How interneurons interact with principal  
6 cells to affect bulbar processing is not known though the mechanism is likely to be differ-  
7 ent than in sensory cortical regions since the olfactory bulb lacks an obvious topographical  
8 organization; neighboring glomerular columns, representing inputs from different receptor  
9 neuron subtypes, typically have different odor tuning. Determining the spatial scale over  
10 which interneurons such as granule cells can affect principal cells is a critical step towards  
11 understanding how the olfactory bulb operates. We addressed this question by assaying in-  
12 hibitory synchrony using intracellular recordings from pairs of principal cells with different  
13 inter-somatic spacing. We find that in acute rat olfactory bulb slices, inhibitory synchrony  
14 is evident in the spontaneous synaptic input in mitral cells separated up to 300  $\mu\text{m}$ . At all  
15 inter-somatic spacing assayed, inhibitory synchrony was dependent on fast  $\text{Na}^+$  channels,  
16 suggesting that action potentials in granule cells function to coordinate GABA release at rel-  
17 atively distant dendrodendritic synapses formed throughout the the dendritic arbor. Our  
18 results suggest that individual granule cells are able to influence relatively large groups of  
19 mitral and tufted cells belonging to clusters of at least 15 glomerular modules, providing a  
20 potential mechanism to integrate signals reflecting a wide variety of odorants.

### 21 **Introduction**

22 Inhibitory local circuits play a central role in processing olfactory information. In insects,  
23 blockade of inhibitory function in the antennal lobe, the first processing region of olfactory

24 information, selectively impairs the normal ability of the these animals to make fine distinc-  
25 tions between related similar odors while leaving intact the ability to distinguish between  
26 unrelated olfactory stimuli (1). Recent work in the olfactory bulb, the mammalian equiv-  
27 alent to the antennal lobe, has demonstrated parallel findings when selectively perturbing  
28 inhibition onto the principal neurons mitral (MC) and tufted cells (TC) (2). These studies  
29 suggest that olfactory information can be processed through at least two distinct streams – a  
30 hardwired pathway that does not require extensive local inhibitory interactions but which  
31 reveals only relatively coarse distinctions among odors and a more complex circuit involv-  
32 ing functions mediated by inhibitory interneurons that facilitates fine distinctions. The lat-  
33 ter pathway may also be a key site of olfactory learning within the bulb as previous work  
34 has found both LTP and spike timing dependent plasticity on excitatory synapses onto gran-  
35 ular cells, the primary type of GABAergic interneuron the OB (3, 4). Granule cells also re-  
36 ceive a large proportion of top-down and neuromodulatory input (5, 6), suggesting a role  
37 of behavioral state in regulating inhibition. However, how inhibitory interneurons such as  
38 GCs function to enhance olfactory performance is not known.

39 Recent experimental and computational studies of OB circuitry has led to two divergent  
40 views of GC function: that GCs function through locally-mediated inhibition with minimal  
41 integration of information across processing streams, or that GCs operate by interconnect-  
42 ing principal cells belonging to different sensory channels, enabling the circuit to represent  
43 more complex or abstract features than either mitral or tufted cells. In the former model,  
44 GC function would likely enhance fine odor discrimination via actions on nearby princi-  
45 pal cells belonging the same or close glomerular modules while the latter models allows  
46 for extensive cross-channel synaptic interactions. Supporting the first hypotheses are find-  
47 ings that local  $\text{Na}^+$  and  $\text{Ca}^{2+}$  spike propagation can be restricted to small subregions of  
48 the granule cell dendritic arbor (7, 8, 9, 10), physiological and computational studies that  
49 emphasize the ability of granule cells to release their neurotransmitter in a  $\text{Na}^+$  spike in-  
50 dependent manner (11, 12), a physiological investigation *in vivo* demonstrating dendritic  
51 branch-specific odor tuning (13), and that GC-dependent emergent network properties such  
52 as gamma-band local field potential oscillations appeared to be uncorrelated with spiking  
53 activity in GCs (14). Alternatively, previous studies involving simultaneous intracellular  
54 recordings from pairs of MCs separated by up to 200  $\mu\text{m}$ , likely spanning multiple glomeruli  
55 (typically glomeruli range from 50-120  $\mu\text{m}$  in diameter in rodents; 15), have shown syn-  
56 chronous, GC-mediated inhibitory input following olfactory nerve stimulation (16) and  
57 MC depolarization by serotonin (17). It is unknown to what degree this occurs during  
58 spontaneous activity.

59 Through detection of TTX-sensitive coincident inhibitory postsynaptic currents (IPSCs)  
60 on principal cell pairs separated by 200  $\mu\text{m}$  or more, we provide evidence suggesting that  
61 dendrodendritic inhibition spans multiple glomerular columns through a mechanism that re-

62 quires Na<sup>+</sup>-dependent action potentials. Through pharmacological manipulations, we found  
63 that the propensity for detecting coincident inhibition in MC/MC paired recordings can be  
64 increased by passive depolarization of bulbar neurons and decreased by blocking GC spik-  
65 ing with TTX. Phenylephrine (PE), an  $\alpha$  agonist known to increase GC activity (18, 19, 20,  
66 21), also downregulated the amount of coincident inhibition. As activation of the  $\alpha$ -1R is  
67 involved in olfactory learning and memory, our finding suggests that the spatial extent of  
68 inhibitory synchrony may be differentially regulated in different olfactory behaviors and  
69 brain states. This study shows for the first time that inhibition can link a wide spatial range  
70 of glomerular columns in the absence of external synchronizing input, potentially provid-  
71 ing a mechanism of how population codes for different odorants could be refined by local  
72 inhibitory circuits.

## 73 **Methods**

### 74 **Slice Preparation**

75 Horizontal olfactory bulb slices 300  $\mu$ m thick were made from ketamine-anesthetized P14-  
76 25 Sprague-Dawley rats of both sexes as previously described (22, 23). Slices were incu-  
77 bated for 30 min at 30°C and then at room temperature until use. All experiments were car-  
78 ried out in accordance with the guidelines approved by the Case Western Reserve University  
79 Animal Care and Use Committee.

### 80 **Electrophysiology**

81 Slices were placed in a recording chamber and superfused with oxygenated artificial cere-  
82 brospinal fluid (ACSF) at a rate of 1.5 ml/min. Recordings were made between 29-32°C.  
83 ACSF consisted of (in mM): 124 NaCl, 3 KCl, 1.23 NaH<sub>2</sub>PO<sub>4</sub>, 1.2 MgSO<sub>4</sub>, 26 NaHCO<sub>3</sub>, 10  
84 dextrose, 2.5 CaCl<sub>2</sub>, equilibrated with 95% O<sub>2</sub>/ 5% CO<sub>2</sub>. The K<sup>+</sup> concentration was elevated  
85 in “high K ACSF” by increasing the KCl concentration to 6 mM. All whole-cell patch-clamp  
86 recordings were made with Axopatch 1C or 1D amplifiers (Axon Instruments) using borosili-  
87 cate glass pipettes (WPI) of impedances ranging from 2-5M $\Omega$  pulled on a P-97 pipette puller  
88 (Sutter Instruments). Recordings were low-pass filtered at 5 kHz (FLA-01, Cygus Technol-  
89 ogy) and digitized at 10 kHz using an ITC-18 computer interface (Instrutech) connected to a  
90 PC operating Windows 7 using custom software.

91 Slices were imaged using IR-DIC optics on Zeiss Axioskop FS1 or Olympus BX51WI up-  
92 right microscopes. Live 2-photon imaging was performed using a custom-build laser scan-  
93 ning system, as described in previous publications (22, 24, 25). Neuronal cell type was de-  
94 termined based on IR-DIC morphology and soma laminar location. Cell type classification

95 was confirmed in a subset of experiments using 2-photon reconstructions as described in  
96 text. Somatic separation was measured using a calibrated eyepiece reticule.

97 Voltage clamp recordings were made with an internal solution containing (in mM): 140  
98 CsCl, 4 NaCl, 10 HEPES, 2 EGTA, 4 MgATP, 0.3 Na<sub>3</sub>GTP, 10 phosphocreatine, 5 QX-314  
99 with a pH of 7.3 and an osmolarity of 290 mmol/kg. The cesium-chloride solution was  
100 used to reverse the chloride gradient. Alexa 594 (10 μM; Invitrogen) was added to the in-  
101 ternal solution in experiments using live 2-photon visualization. All drugs were purchased  
102 from Sigma except TTX (Calibochem) and Gabazine (Ascent). All drugs were prepared from  
103 aliquots stored at -20°C except for TTX, which was prepared from a stock solution kept at  
104 4°C. The drugs were added to the bath by changing the external solution source.

## 105 Data Analysis

106 Spontaneous IPSCs were detected and measured automatically using a custom algorithm em-  
107 ployed in previous studies (26, 27, 28, 29). Detected events were confirmed by visual anal-  
108 ysis. Event detection and data analysis routines were implemented in Python (version 3.5).  
109 Multiple trials (typically 10-20 episodes each lasting 10 sec; mean 16.9 trials) were acquired  
110 for each condition in each experiment. Summary data are presented as mean ± S.E.M. ex-  
111 cept where noted. Membrane variance was computed over 250 ms duration windows.

112 Cross-correlograms (examples shown in Figs. 2D and 4D) were computed from the onset  
113 lags between all detected IPSC pairs and analyzed between -10 to 10 ms using 0.4 ms time  
114 bins. To determine statistical significance, the maximal cross correlation value (averaged  
115 over 3 bins, 1.2 ms) reported in the actual data was compared with surrogate data created  
116 by permuting inter-IPSC intervals. The mean of 100 interval permutation runs are presented  
117 in example cross correlation plots (e.g., the grey plot in the left panel in Fig. 2D). The prob-  
118 ability that the maximal cross correlation metric in the actual data was larger than expected  
119 by chance was computed empirically using three methods. In the first approach, we gener-  
120 ated a distribution of 2000 maximal cross correlation values from surrogate data in which  
121 the inter-IPSC intervals were permuted. For example, if the peak cross correlation value  
122 obtained in one experiment was larger than 1900 out of 2000 cross correlation values ob-  
123 tained in the interval permutation runs, then probability of inhibitory coincidence would  
124 be assigned as 0.05 (100/2000). This analysis procedure was repeated five times for each  
125 experiment with the median recorded as the *interval permutation-based P value*. Through-  
126 out the study, we express randomization-derived P values as  $-1 * \ln(P)$  where more positive  
127 numbers reflect lower P values. The upper limit on this metric ( $7.6 = -1 * \ln(1/2000)$ ) re-  
128 flects experiments in which the peak cross correlation values were lower in all randomiza-  
129 tion runs than in the actual (non-permuted) data set.

130 In the second randomization control method, we used trial shuffling to estimate whether

131 each experiment had beyond-chance rates of inhibitory coincidence. In this test, we ran-  
132 domly selected different trials for cell A and for cell B from the same experiment, creating  
133 at data set composed exclusively of non-simultaneous records (eg, trial 1 from cell A com-  
134 pared with trial 3 from cell B). This process was repeated 2000 times in each experiment to  
135 generate a P value based on the distribution of trial shuffled recordings. As with the inter-  
136 val permutation control procedure, we repeated the trial shuffling analysis five times and  
137 recorded the median of those runs as the *trial shuffling-based P value*. Both the interval per-  
138 mutation and trial shuffling control procedures abolished the peak near 0 ms present in ex-  
139 periments with obvious inhibitory synchrony determined by visual inspection of raw intra-  
140 cellular records. Figures 2 and 4 illustrate cross correlation plots following interval permu-  
141 tation and trial shuffling on two example paired recordings with frequent near-coincident  
142 IPSCs.

143 Both interval permutation and trial shuffling approaches generated similar metrics  
144 expressing the degree of inhibitory synchrony evident our primary data set of 89 paired  
145 MC/MC recordings assayed under standard ACSF conditions ( $R = 0.92$ ;  $P < 10^{-30}$ ; correla-  
146 tion performed on the  $-\ln(P)$  metric as used throughout the study). We also computed a *dual*  
147 *randomization P value* where we combined both randomization methods by computing boot-  
148 strap distributions based on interval permutations of trial shuffled data. Using a standard  
149 0.05 threshold for statistical significance, the *dual randomization P value* generated the most  
150 conservative ranking of inhibitory synchrony across experiments ( $N = 17$  experiments with  
151 empirical P values lower than this threshold), compared with  $N = 21$  for the interval per-  
152 mutation approach and  $N = 23$  using only trial shuffling. 16 experiments had P values  $<$   
153 0.05 in all three randomization tests. Rather than report separate results from interval per-  
154 mutation and trial shuffling procedures, we only report only the final *dual randomization P*  
155 *value* throughout study and in the illustrations.

156 We set a threshold for statistical significance at 0.015 using the *dual randomization P*  
157 *value* throughout the study. This value balanced competing goals of minimizing the false  
158 rejection rate while controlling the family-wise error rate. A more conservative approach,  
159 such as Bonferroni corrections, would adjust the significance threshold to  $0.05/N$  where  $N$   
160 is the number of independent tests performed. This simple approach proved unworkable  
161 since the very low thresholds in our large  $N$  data set ( $P = 0.00056$  for our population of 89  
162 MC/MC paired recordings) rejected many experiments with obvious inhibitory coincidence  
163 and central peaks on cross correlation plots that were abolished by both interval permu-  
164 tation and trial shuffling. As noted in other work, this approach often rejects true positives  
165 and, therefore, tends to reduce statistical power (30). Employing a Bonferroni correction ap-  
166 proach also would lead to different thresholds for statistical significance across the differ-  
167 ent groups of experiments. The empirical P value approach we followed has been used in  
168 previous studies (31, 32, 33, 34) and allowed us to specify a uniform threshold (0.015) that

169 was more stringent than the P value traditionally employed with single tests (0.05). Using  
170 all three randomization approaches, we found a large drop off in P values near this thresh-  
171 old (from  $< 0.0101$  in all experiments labeled significant to 0.042 in the best experiment  
172 labeled as non-significant). In our primary data set with 89 paired MC/MC recordings, us-  
173 ing this threshold resulted in 16 experiments with significant inhibitory synchrony. In Fig.  
174 2E, we also estimated the degree of inhibitory synchrony using the clipped cross-intensity  
175 function approach (CIF; 35) we have used in a related study (17). This metric was based on  
176 the count of near-coincident IPSP (onset times within 3 ms) divided by the total number of  
177 IPSCs in the cell with the fewest IPSC. As with the cross-correlation method, we computed  
178 P values for each experiment empirically based on a distribution of CIF metrics generated in  
179 surrogate data in which inter-IPSC intervals were permuted.

180 The estimates of the rates of above-chance inhibitory coincidence presented in Fig. 7D  
181 were computed by subtracting the rates of near-coincident IPSCs (onset latencies within 3  
182 ms) before and after trial shuffling. We plotted the rate of near-coincident IPSCs beyond ex-  
183 pected by chance as a percentage of the TTX-sensitive IPSC rate in each cell. For example, if  
184 the actual rate of near-coincident IPSCs was 2 Hz which then dropped to 0.5 Hz following  
185 trial shuffling, then the rate of “beyond-chance” near-coincident IPSCs would be 1.5 Hz. If  
186 the spike dependent rate of spontaneous IPSCs was 15 Hz in one of the cells in the paired  
187 recording (reflecting 20 Hz spontaneous IPSCs recorded in ACSF and 5 Hz in TTX), then “be-  
188 yond chance” coincident IPSCs would constitute 10% of the spike-driven spontaneous IPSCs  
189 in that neuron.

## 190 Cellular reconstructions

191 The horizontal span of the GC dendritic arbor was calculated from 19 published GC images  
192 from the following references: 36, Figure 2, 37 Figures 1C, 2A, 2H and 3A, 8 Figure 2, 38  
193 Fig 1, 39 Fig 4A, 5A and 6A, and 40 Figure 1M-O. To account for shrinkage during fixation,  
194 the measured width was increased by 15% in papers that explicitly stated that fixation was  
195 used (41 – 10% lateral shrinkage, 42 – 10-20% on each dimension). The mean GC dendritic  
196 width we estimated from these published studies was  $113 \pm 11.1 \mu\text{m}$  with a standard devia-  
197 tion of  $48.5 \mu\text{m}$ .

198 We estimated the thickness of the glomerular layer in 10 OB slices visualized using a 5X  
199 objective ( $185 \pm 21 \mu\text{m}$ ; mean  $\pm$  S.D.). We estimated the glomerular packing density us-  
200 ing our measured GL thickness and the mean glomerular diameter reported in two anatomi-  
201 cal studies ( $75 \mu\text{m}$ ; 43, 44). The horizontal span of MC lateral dendrites was estimated from  
202 maximal 2-photon Z-stack projections ( $N = 33$  lateral dendrites from 21 visualized MCs;  $349$   
203  $\pm 180 \mu\text{m}$ ; mean  $\pm$  S.D.). The actual length of the lateral dendrites was  $\sim 10\%$  larger than  
204 the horizontal span (the component of distance within the MCL), reflecting angled trajectory

205 of these dendrites from the cell body into the EPL.

## 206 Results

207 We divided our analysis of inhibitory input onto principal cells in this study into two sec-  
208 tions, starting with determining the properties of spontaneous IPSCs in MCs and TCs (Fig. 1)  
209 and then focusing on measuring coincident inhibition across pairs of intracellularly-recorded  
210 principal cells to assess the spatial scale of inhibitory synchrony in the OB (Figs. 2-7). Both  
211 MCs and TCs receive frequent spontaneous IPSCs, shown as inward currents in the exam-  
212 ple voltage-clamp recordings in Fig. 1A-B which employed CsCl-based intracellular solu-  
213 tions that reversed the normal chloride gradient. Spontaneous inwards currents were abol-  
214 ished by the GABA-A receptor antagonist gabazine (10  $\mu$ M; 96.6% reduction in membrane  
215 current variance; Fig. 1C), indicating that spontaneous IPSCs form the majority of the de-  
216 tectable synaptic input onto OB principal cells under these recording conditions. Most of the  
217 detected IPSCs in MCs appeared to originate from synapses onto secondary dendrites and  
218 not from synapses onto the distal apical dendrite. In a subset of 21 MCs visualized using  
219 live 2-photon microscopy, we found only a small decrease in the rate of spontaneous IPSCs  
220 in MCs with apical dendrites truncated before they reached the glomerular layer ( $12.7 \pm$   
221  $1.5$  Hz;  $N = 15$ ) compared with MCs with intact apical dendrites ( $14.6 \pm 1.6$  Hz;  $N = 6$ ;  $P >$   
222  $0.05$ ; unpaired t-test; mean  $\pm$  S.E.M.).

223 We first compared the baseline frequency and amplitude of inhibitory inputs onto both  
224 classes of principal cells. Mitral cells received a significantly higher rate of spontaneous  
225 IPSCs than TCs (Figure 1D-E), consistent with results from a recent comparison of bulbar  
226 neurons (45). The mean IPSC amplitude was modestly smaller in TCs than MCs (Fig. 1F)  
227 while the rising phase kinetics were similar in both cell types (Fig. 1G). In both cell types,  
228 blockade of voltage-gated  $\text{Na}^+$  channels with 1  $\mu$ M TTX dramatically decreased sponta-  
229 neous IPSC frequency (middle panel in Fig. 1D), suggesting that most synaptic responses  
230 resulted from  $\text{Na}^+$ -based spiking in GCs or other classes of GABAergic interneurons. En-  
231 hancing GC excitability by stimulating  $\alpha$  adrenergic receptors with phenylephrine (PE; 10  
232  $\mu$ M; 18, 19, 20, 21) was able to restore basal IPSC rates in both principal cell types even in  
233 the presence of TTX (right panel in Fig. 1D).

234 Surprisingly, throughout these manipulations the ratio of spontaneous IPSC frequencies  
235 between MCs and TCs remained relatively constant (Fig. 1E), suggesting that the two cell  
236 types differed primarily in the density of inhibitory connections with GCs. The proportion  
237 of spike-driven IPSCs also was similar in both cell types (mean of 70% in MCs vs 61% in  
238 TCs; Fig. 1H). We observed a strong correlation between miniature IPSC rates and basal  
239 spontaneous IPSC rates that was more pronounced in MCs (Fig. 1I;  $r = 0.59$ ;  $P < 10^{-7}$ ) than  
240 TCs (Fig. 1J). As with the other measures of inhibitory function, we found more variability

241 among TC IPSC rates, including an outlier recording with very high spontaneous IPSC rates.  
242 Excluding this outlier TC, the correlation between mini IPSC rates and basal spontaneous  
243 IPSC rates was statistically significant ( $r = 0.532$ ,  $P = 0.013$ ;  $r = 0.251$  including outlier  
244 value). Together, these results suggest that the basal inhibitory synaptic tone in MCs and  
245 TCs is determined primarily by the density of GABAergic synapses on the secondary den-  
246 drites (and potentially somatic sites). Both cell types likely sample from similar pools of  
247 spontaneously active interneurons, accounting for the similar properties of individual IPSCs  
248 in MCs and TCs, the similar fraction of TTX-sensitive IPSCs and the ability of miniature IPSC  
249 rates to predict the basal spontaneous IPSC rates. The difference in inhibitory synaptic tone  
250 we and others (45) observe in OB principal cells likely reflects fewer synaptic contacts on  
251 TCs vs MCs, consistent with previous anatomical studies (46; 47).

### 252 **Coincident inhibition between pairs of OB principal cells**

253 After determining baseline properties of spontaneous IPSCs in MCs and TCs, we next  
254 recorded from pairs of principal cells ( $N = 89$  MC/MC and  $24$  MC/TC) separated by vari-  
255 able distances to determine the spatial scale of over which synchronized inhibition occurs in  
256 the OB. A subset ( $\sim 15\%$ ) of paired MC recording had multiple coincident IPSCs evident by  
257 visual inspection of intracellular records, such as the example paired recording in Fig. 2A-  
258 C. We used two independent control procedures to determine if the rate of coincident IPSCs  
259 was greater than expected by chance in each paired MC/MC recording. We first computed  
260 the cross-correlation based on IPSC onset times in both cells and compared the maximal  
261 cross-correlation function (“actual”) to randomized data in which the intervals between  
262 recorded IPSCs were permuted (“interval permutation”; Fig. 2D, left). In the second analy-  
263 sis method, we compared the maximal cross-correlation function computed from actual data  
264 with the same analysis performed trial shuffled recorded (Fig. 2D, right; see Methods), gen-  
265 erating a dataset with physiological IPSC timing statistics but no actual coincidences since  
266 only non-simultaneously recorded datasets were analyzed (e.g., trial 1 from MC-A with trial  
267 2 from MC-B). We computed the probability that actual maximal cross correlation func-  
268 tion was larger than expected by chance by combining the interval permutation and trial  
269 shuffling procedures 2000 times; the threshold for significance employed was  $P < 0.015$ ;  
270 see Methods for details). 16 of 89 MC/MC paired recordings met this criterion for above-  
271 chance rates of near coincident IPSCs. All 16 MC/MC paired recordings identified as having  
272 inhibitory synchronization assayed through the cross-correlation method also exhibited sta-  
273 tistically significant rates of coincident IPSCs when tested using the cross-intensity function  
274 method employed in previous work (Fig. 2E; 26).

275 Near-coincident synaptic inputs identified by our analysis (which captured onset laten-  
276 cies that differed by up to 20 ms) were nearly synchronous in the subgroup of 16 MC/MC



277 paired recording classified as statistically significant. The mean latency between IPSC on-  
278 set times across the two cells was  $0.05 \pm 0.13$  ms (range -1.0 to 1.4 ms;  $N = 16$  experiments;  
279 histogram shown in Fig. 2F). There was no difference between the overall mean IPSC rates  
280 in the 16 significant MC/MC paired recordings and the other 73 paired recordings (Fig.  
281 2G). The inhibitory synchrony we observe was unlikely to arise from glomerular-layer lo-  
282 cal circuits since the 16 significant MC/MC paired recordings included 3 experiments in  
283 which both MCs were reconstructed using live 2-photon imaging and at least one MC had a  
284 truncated apical dendrite that was severed within the EPL (including the example MC pair  
285 shown in Fig. 2A-C).

286 We determined the spatial scale of coincident inhibition by plotting the P value com-  
287 puted from the interval permutation analysis against the separation between the two MC  
288 somata (Fig. 3A-B). Most MC/MC paired recordings with significant inhibitory synchrony  
289 occurred between closely-spaced neurons (inter-soma distances  $< 100 \mu\text{m}$ ). The maximal  
290 somatic separation that generated inhibitory synchrony beyond chance levels in standard  
291 ACSF was  $220 \mu\text{m}$ . When restricted to inter-somatic spacing less than  $220 \mu\text{m}$ , we still ob-  
292 served no difference in the mean IPSC rate between significant and non-significant MC/MCs  
293 pairs ( $P = 0.71$ ; unpaired t-test;  $t(57) = 0.38$ ) suggesting that our metric of inhibitory syn-  
294 chrony was not simply revealing an underlying bias toward MCs with high (or low) sponta-  
295 neous IPSC rates. The distribution of P values estimated from interval permutation in trial  
296 shuffled data (all less than 0.015; Fig. 3B, right; equivalently, greater than 4.2 on the scale  
297 in Fig. 3B) was similar to the distribution of the actual non-significant MC/MCs (non-trial  
298 shuffled data; black symbols in Fig. 3B, left). These results suggest our dataset of MC/MCs  
299 paired recordings comprised two populations: a minority (18%) which received coincident  
300 inhibition, presumably reflecting divergent output from one or more spontaneously spiking  
301 interneurons, and MC/MC pairs that received no detectable inhibitory coincidence.

302 The relatively large spatial scale over which we observe inhibitory synchrony under  
303 basal conditions (up to  $220 \mu\text{m}$  somatic separation) suggests that individual interneurons  
304 can couple MCs associated with different glomeruli (mean glomerular diameter  $75 \mu\text{m}$ ; 43,  
305 44). We confirmed this was possible by recording and visualizing two MCs with intact api-  
306 cal dendritic tufts that terminated in nearby but different glomeruli (Fig. 4A-C; inter-soma  
307 distance  $40 \mu\text{m}$ , apical dendritic tufts separated by  $130 \mu\text{m}$ ). The cross correlation function  
308 in this paired recording (Fig. 4D, left;  $P < 0.0005$ ) had a peak at 0.2 ms.

309 Under basal (unstimulated) conditions, we also observed inhibitory synchrony between  
310 heterogeneous pairs of principal cells (experiments including one MC and one TC record-  
311 ing; Fig. 5A). Figure 5B illustrates an example of coincident IPSCs recorded in a MC/TC pair  
312 with inter-soma spacing of  $80 \mu\text{m}$  (measure as horizontal distance through the MCL, ignor-  
313 ing the different distances in the MCL-to-GL direction). Using the same criteria applied to  
314 MC/MC paired recordings, 3 of 24 MC/TCs had statistically significant inhibitory coinci-

315 dence (Fig. 5C), including the example recording presented in Fig. 5B. The three significant  
316 MC/TC pairs were separated by between 20 and 150  $\mu\text{m}$  (span along the MCL). The mean  
317 latency between near-coincident IPSCs was  $0.2 \pm 0.33$  ms (range -0.2 to 1 ms). As with the  
318 MC/MC paired recording that showed elevated rates of near-coincident IPSCs, there was no  
319 difference in the mean IPSC rates between MC/TC pairs with and without demonstrable in-  
320 hibitory synchrony ( $P > 0.05$ ; unpaired t-test;  $t(46) = 1.73$ ). These results suggest that not  
321 all inhibitory local circuits in the OB are segregated into MC- and TC-specific subgroups. In-  
322 stead, individual non-glomerular layer interneurons appear to innervate both populations of  
323 principal cells.

### 324 Spike-dependent inhibitory synchrony

325 We next asked if near coincident IPSCs recorded in pairs of principal cells required  $\text{Na}^+$ -  
326 based action potentials in the common presynaptic interneurons. Bath application of TTX  
327 (1  $\mu\text{M}$ ) abolished inhibitory synchrony in all 16 MC/MC pairs with statistically significant  
328 rates of near coincident IPSCs (Fig. 5D). No previously non-significant paired recording  
329 experiments became significant through this treatment. The loss of inhibitory synchrony  
330 did not simply reflect the lower overall rate of spontaneous IPSCs in TTX since addition  
331 of the GC-stimulating  $\alpha$  receptor agonist PE (10  $\mu\text{M}$ ; 18, 19, 20, 21), failed to promote  
332 synchronous inhibition in MC paired recordings (Fig. 4D; 0/44 experiments). We found  
333 similar results in heterogeneous MC/TC pairs where TTX abolished inhibitory synchrony in  
334 the 3 paired MC/TC recordings with statistically significant rates of near coincident IPSCs  
335 (Fig. 4E). Since voltage-gated  $\text{Na}^+$  channels were already blocked in MC and TC voltage-  
336 clamp recordings (because of QX-314 in the internal solution), these results suggest that  
337 synchronous IPSCs resulted from spontaneous spiking in GABAergic interneurons that form  
338 divergent synaptic connections onto MC and MC/TC ensembles.

339 If near coincident IPSCs recorded in pairs of principal cells reflect spontaneous spik-  
340 ing in presynaptic GABAergic interneurons, we hypothesized that passively depolarizing  
341 interneurons by elevating extracellular  $\text{K}^+$  concentration (from 3 to 6 mM; “high K” ACSF)  
342 would enhance inhibitory synchrony. As shown in the example records in Fig. 6A, high  
343 K ACSF increased both the rate of spontaneous IPSCs in MCs and also the incidence of  
344 near-coincident IPSCs. Of the 19 paired MC experiments in high K ACSF, 9 (47%) had sta-  
345 tistically significant inhibitory synchrony, including the paired recording shown in Fig.  
346 6A. Two of the 9 significant MC/MC recordings already had significant rates of inhibitory  
347 synchrony in control conditions, prior to treatment with high K ACSF (Fig. 6B). In the re-  
348 maining 7 significant MC/MC recordings, no inhibitory synchrony was evident except in  
349 high K ACSF. The mean IPSC latency in the 9 MC paired recordings with near coincident  
350 IPSCs in high K ACSF was  $0.24 \pm 0.19$  ms (range -0.6 to 1.4 ms).

351 Our results thus far demonstrate divergent effects of passive depolarization with high K  
352 ACSF, which promoted inhibitory synchrony, and activation of adrenergic receptors with  
353 PE, which stimulated GABA release (increasing miniature IPSC rates) but did not trigger  
354 more frequent coincident IPSCs. Consistent with this model, PE combined with high K ACSF  
355 increased spontaneous IPSC rates (Fig. 6C) but abolished most inhibitory synchrony (only  
356 1/10 experiments with PE + high K ACSF has statistically significant inhibitory synchrony;  
357 Fig. 6D). As with our earlier results suggesting a requirement for Na<sup>+</sup>-based action poten-  
358 tials, inhibitory synchrony present in high K ACSF was abolished in TTX (Fig. 6D; 0/9 ex-  
359 periments including 3 MC paired recordings that had statistically significant inhibitory syn-  
360 chrony in high K ACSF).

361 While high K ACSF did not affect the amplitudes of spontaneous IPSCs recorded in MCs,  
362 PE triggered a modest but statistically significant decrease in mean IPSC amplitude (29%  
363 decrease; Fig. 6E). This difference primarily reflected an over-representation of IPSCs with  
364 very small amplitudes (see IPSC amplitude histograms in Fig. 6F, inset). We, therefore,  
365 tested whether the lack of statistically significant inhibitory synchrony following treatment  
366 with PE and high K ACSF reflected a “dilution” effect that prevented detecting above-chance  
367 inhibitory synchrony. We tested for this possibility by restricting our cross correlation anal-  
368 ysis to spontaneous IPSCs greater than an arbitrary minimum amplitude. As shown in plot  
369 in Fig. 6F, we failed to find statistically significant inhibitory synchrony when analyzing  
370 different subsets of large-amplitude IPSCs in the 10 MC pairs with no evident inhibitory  
371 synchrony in high K ACSF. Eliminating spontaneous IPSCs less than 50 pA also abolished in-  
372 hibitory synchrony in the one MC/MC paired recording with statistically significant rates  
373 of near-coincident IPSCs (Fig. 6G), suggesting that some synchronous inhibitory inputs  
374 generated relatively small amplitude (< 50 pA) IPSCs.

375 Passively depolarizing bulbar neurons with high K ACSF also increased the spatial ex-  
376 tent of inhibitory synchrony. As shown in Fig. 7A, MC pairs with inter-soma distances up  
377 to 300  $\mu\text{m}$  exhibited statistically significant inhibitory synchrony (versus up to 220  $\mu\text{m}$  in  
378 control ACSF). As in previous control analyses, trial shuffling eliminated all statistically sig-  
379 nificant inhibitory synchrony (Fig. 7A, right). The overall proportion of MC/MC paired  
380 recordings with significant inhibitory synchrony increased from 18% in control ACSF to  
381 47% in high K ACSF (Fig. 7B). We found an even more pronounced increase in the propor-  
382 tion of experiments with significant inhibitory synchrony when only considering MC pairs  
383 with inter-soma separations > 100  $\mu\text{m}$  (right bars in Fig. 7B). Consistent with this hypoth-  
384 esis, we found a statistically significant difference between plots of cumulative inter-soma  
385 distance in experiments with inhibitory synchrony in control and high K ACSF (Fig. 7C,  
386 left). The midpoint in MC separations with inhibitory synchrony (similar to EC50 estimates)  
387 shifted from 60  $\mu\text{m}$  in control to 140  $\mu\text{m}$  in high K ACSF (arrowheads along the X axis in  
388 Fig. 7C, left) There was no difference in the cumulative inter-soma distance plots when con-

389 sidering all MC/MC pairs (regardless of whether they had inhibitory synchrony) between  
390 control and high K ACSF ( $P > 0.05$ ; K-S test;  $K-S(19,19) = 0.15$ ; Fig. 7C, right).

391 While high K ACSF increased the fraction of experiments with inhibitory synchrony and  
392 the spatial extent of inhibitory synchrony, this treatment did not affect the proportion of pu-  
393 tative synchronized IPSCs within each recording. Actual measurements of near-coincident  
394 IPSCs (e.g., number of IPSCs in one recording with a corresponding IPSC within 3 ms in the  
395 other, simultaneous recording) reflect the sum of two different frequencies: the rate of real  
396 (“biological”) coincident IPSCs, presumably corresponding to coordinated release of GABA  
397 at two different synapses from the same interneuron, and the rate of chance coincidences.  
398 We calculated the “excess coincidence rate”—reflecting an estimate of the underlying fre-  
399 quency of actual coordinated GABA release events—by subtracting the rate of random  
400 coincidences (computed by permuting inter-IPSC intervals) from the measured rate of near  
401 coincident IPSCs. The excess inhibitory coincidence rate modestly increased from  $0.70 \pm$   
402  $0.14$  Hz in the 16 MC/MC with statistically significant inhibitory synchrony in control ACSF  
403 to  $1.62 \pm 0.69$  Hz in the 9 MC/MC pairs with inhibitory synchrony recorded in high K ACSF  
404 ( $P > 0.05$ ; unpaired t-test). However, expressed as a proportion of the ongoing sponta-  
405 neous IPSC frequency in each condition, there was almost no difference in the rate of excess  
406 IPSCs between control (8.4% of all spontaneous IPSCs) and high K ACSF (7.5%; Fig. 7D). As  
407 expected, we found near-zero rates of excess coincident IPSCs following trial shuffling or  
408 when assaying MC/MC pairs that did not have statistically significant inhibitory synchrony  
409 (Fig. 7D, right columns).

410 The similar percentage of near-coincident events detected under different levels of rates  
411 of ongoing spontaneous IPSCs suggests that inhibitory synchrony reflected inputs from small  
412 but constant fraction of presynaptic inputs. This 8 percentage estimate could arise from a  
413 single spontaneously active interneuron that innervated both MCs assuming each MC also  
414 receives input from  $\sim 12$  other active interneurons (or from 2 convergent interneurons and  
415  $\sim 23$  other active interneurons, etc). This percentage would remain constant during pas-  
416 sive depolarization tests if the treatment had a similar effect in all presynaptic GCs. If the  
417 inhibitory coincidence we report arises on average from a single active interneuron, then  
418 this provides an estimate of the total number of active presynaptic interneurons each MC  
419 receives ( $\sim 13$ ).

## 420 Discussion

421 In this study, we assayed functional synaptic connectivity patterns using paired intracellular  
422 recordings and make three primary conclusions. First, we find that the frequency of spon-  
423 taneous IPSCs is strongly correlated with the frequency of miniature TTX-resistant IPSC in  
424 MCs suggesting that most inhibitory inputs to MCs behaves as a uniform population. Sec-

425 ond, we find that Na<sup>+</sup> spike-driven coincident inhibition can link pairs of principal cells  
426 belonging to different glomerular columns as well as different types of principal cells (mitral  
427 and tufted cells). These results provide the first direct demonstration that distant pairs of  
428 principal cells (with apical tufts innervating different glomeruli) can be functionally linked  
429 by coincident inhibition under physiological conditions. This finding is consistent with  
430 previous results from Schoppa (16) who observed inhibitory coupling between distant mi-  
431 tral cells following tetanic electrical stimulation. However, direct pathway stimulation can  
432 generate synchronize firing in multiple interneurons—potentially generating coincident in-  
433 hibitory postsynaptic responses in MCs as a consequence. These types of “common driver”  
434 mechanisms are unlikely to account for inhibitory synchrony apparent under resting (non-  
435 stimulated) conditions employed in the present study, leaving spontaneous Na<sup>+</sup> spiking in  
436 GCs that are presynaptic to both MCs as the most likely explanation for above-chance rates  
437 of coincident IPSC. And finally, we found that coincident inhibition onto MCs depends on  
438 Na<sup>+</sup> spiking in GCs and can be disrupted by strong depolarizing stimuli. Together, these  
439 results suggest that bulbar interneurons can play a pivotal role in the olfactory system by  
440 coordinating responses in principal cells belonging to different glomerular channels. These  
441 synaptic interactions can function to modulate mitral and tufted cell firing patterns to re-  
442 flect contextual information associated with the larger glomerular network activated by an  
443 odor.

#### 444 **Difference in inhibitory tone between mitral and tufted cells**

445 To our knowledge, our study is the first to compare inhibitory tone in mitral and tufted cells  
446 under normal physiological conditions and when Na<sup>+</sup>-based spiking is abolished by TTX.  
447 Our finding that TCs receive less pronounced inhibition (approximately three-fold fewer  
448 IPSCs) is consistent with several previous reports that assayed the rate of spontaneous in-  
449 hibitory postsynaptic responses (45; 48). This difference in spontaneous IPSC/P rate could be  
450 explained by preferential innervation of MCs by more active interneurons compared with  
451 TCs or by a difference in overall density of inhibitory innervation in the principal cell types.  
452 Our observation that the three-fold difference in IPSC rate between MCs and TCs is main-  
453 tained when Na<sup>+</sup> spiking is blocked with TTX and then when GC excitability is enhanced by  
454 PE suggests that this difference reflects primarily a higher density of inhibitory synaptic in-  
455 puts on MCs. In principle, the difference in synaptic number may reflect the narrower span  
456 of secondary dendrites of TCs compared to MCs (47, 46). However, direct tests of postsynap-  
457 tic responses elicited by focal GABA uncaging along the secondary dendrites (49) demon-  
458 strates that MCs (and presumably TCs) are primarily sensitive only to inhibitory inputs con-  
459 tacting the proximal section of the secondary dendritea (estimated ~ 150 μm, twice the 75  
460 μm electronic length constant for dendritic GABA-evoked responses recorded in the somata;  
461 49). Differences in the length of the secondary dendrites between MCs and TCs beyond this

462 proximal region are unlikely to influence the incidence of coincident inhibition detected in  
463 somatic recordings.

464 Secondary dendrites of MCs and TCs also arborize in different zones within the EPL  
465 where they contact different subpopulations of GCs (50, 46). Diminished inhibitory tone in  
466 TCs could, therefore, reflect a lower density of reciprocal contacts formed between these  
467 two GCs and principal cells. While Greer and colleagues (51) found a similar density of re-  
468 ciprocal synapses throughout the EPL, to our knowledge the density of dendrodendritic  
469 synapses formed by deep and superficial GCs has not been compared quantitatively. Our  
470 finding that coincident inhibition can be detected in MC/TCs (in addition to MC/MC pairs)  
471 suggests that the distinction between deep and superficial GCs targeting different subclasses  
472 of principal cells is not absolute with some GCs likely forming synaptic connections between  
473 MCs and TCs (and see 50 and 52).

#### 474 **Synchronized inhibition links principal cells across multiple glomerular columns**

475 We detected synchronized inhibition using standard methods (34) based on cross-  
476 correlation analysis of IPSC onset times and employed two different control procedures  
477 to estimate the frequency of coincident IPSCs expected by chance in each experiment (in-  
478 terval permutation and trial shuffling). The spontaneous IPSC frequency was only modestly  
479 reduced in visualized MCs with apical dendrites truncated before reaching the glomeru-  
480 lar layer, compared with intact MCs, suggesting that most of the inhibitory tone detected  
481 in somatic recordings from OB principal cells originates from interneurons outside of the  
482 glomerular layer, presumably GCs. While several populations of non-GC interneurons exist  
483 in the GCL, these appear to target either TCs (GL-dSACs, 53) or GCs (25, 54). A recent study  
484 (55) has found that parvalbumin (PV)-positive interneurons located in the EPL form recipro-  
485 cal synapses with MCs and, therefore, could also contribute to the inhibitory synchrony we  
486 observe. However, PV EPL interneurons appear to fire at high rates ( $> 40$  Hz in 55), which  
487 is inconsistent with the very low rates of beyond-chance synchronized IPSCs in our MC/MC  
488 paired recordings ( $\sim 0.7$  Hz in ACSF).

489 Coincident inhibition onto MC/MC and MC/TC pairs was abolished in TTX, suggesting  
490 that they likely originate from GABA release sites coupled by  $\text{Na}^+$ -based action potentials in  
491 GCs. The absence of detectable inhibitory synchrony in our study was unlikely to occur sim-  
492 ply because of the lower IPSC rate in TTX since we also observed no detectable coincident  
493 inhibition (beyond chance levels) when GCs were stimulated with PE after  $\text{Na}^+$  spikes were  
494 abolished. This treatment restored near-control rates of spontaneous IPSCs in both MCs and  
495 TCs but did not reveal inhibitory synchrony. This finding suggests that in absence of  $\text{Na}^+$ -  
496 based APs, direct depolarization of GCs is unable to trigger coordinated GABA release at  
497 multiple dendritic spines.

498 Granule cells generate APs in response to depolarizing stimuli that propagate throughout  
499 the dendritic arbor (56). Since many of MC pairs we find receive synchronized inhibition  
500 are separated by distances that are the far extreme of what should be possible given the  
501 electrotonic length constant of MC secondary dendrites assayed from focal GABA uncaging  
502 ( $\sim 75 \mu\text{m}$ ; 49), it is likely that  $\text{Na}^+$ -based APs coupled GABA release at different spines  
503 along the GC dendritic tree. This mechanism would explain the ability of TTX to abolish  
504 inhibitory coupling in MC/MC and MC/TC paired recordings and the inability of increas-  
505 ing excitability in TTX with PE to recover inhibitory synchrony in pairs known to share a  
506 common presynaptic interneuron.

507 Functional (13) and computational (57) studies have suggested an important role for  
508 spatially-localized  $\text{Na}^+$  and  $\text{Ca}^{2+}$  spikes in GCs (8, 9, 10). The extent of spike propagation  
509 within GC dendrites represents an attractive mechanism to regulate the degree of inhibitory  
510 synchrony in principal cells. At the smallest extreme, individual GC spines are likely able  
511 to release GABA autonomously, leading to an increase in asynchronously inhibition in  
512 MCs. Removing extracellular  $\text{Mg}^{2+}$  greatly facilitates GABA release from GCs by enhanc-  
513 ing  $\text{Ca}^{2+}$  influx through NMDA receptors located in dendritic spines (58, 26). However,  
514 this treatment does not lead to an increase in coincident IPSPs, even between nearby pairs  
515 of MCs (26)–likely reflecting uncoordinated release events in different spines. In contrast  
516 to low  $\text{Mg}^{2+}$  treatment, the present study found that increasing extracellular  $\text{K}^+$  increased  
517 both IPSC frequency and the incidence of coincident inhibition. Presumably elevated  $\text{K}^+$   
518 increased the frequency of spontaneous spiking in GCs and, therefore, the frequency of  
519 near-simultaneous release of GABA on spines that synapse onto different principal cells.  
520 Further increasing the excitability of GCs by combining elevated  $\text{K}^+$  with PE greatly dimin-  
521 ished the incidence of synchronized inhibition. This effect probably reflected depolarization  
522 blockade of AP generation in GCs rather than dilution of synchronized IPSCs by an ele-  
523 vated frequency of small-amplitude asynchronous events since restricting our analysis to  
524 large-amplitude IPSCs failed to recover evidence for coincident inhibition.

### 525 **Functional significance of coincident inhibition onto OB principal cells**

526 The central finding in this study is that individual GCs can generate coordinated inhibition  
527 onto relatively distant principal cells. This result suggests that GCs can function to influ-  
528 ence firing patterns of output neurons belonging to different glomerular columns. While  
529 we demonstrate directly that coincidence inhibition occurs spontaneously in MCs associated  
530 with nearby glomeruli (Fig. 4), the spatial extent over which we observe synchronized inhi-  
531 bition suggests that individual GCs influence activity over an even larger range of glomeru-  
532 lar columns. The average diameter of a glomerulus is  $\sim 75 \mu\text{m}$  (range  $50\text{--}120 \mu\text{m}$ ; 15) and a  
533 rough estimate of the 2-dimensional packing density is 2.5 glomeruli per  $100 \mu\text{m}$  span par-

534 allel to the MCL (185  $\mu\text{m}$  estimated glomerular layer width). Assuming at least two layers  
535 of intact glomeruli per slice (but likely 3-4 in some slices), leads to a maximal span of 14  
536 glomerular columns per GC (Fig. 7E) and an estimated average connectivity of 7 columns  
537 per GC. This analysis is based solely on detecting the incidence of coincident IPSCs exceed-  
538 ing chance, so it likely represents an underestimate since infrequently discharging GCs will  
539 generate too few coincident IPSCs to be detected in our assay. This analysis also does not ac-  
540 count for the variable trajectory of the apical dendrite as it passed through the EPL, which  
541 also could enhance the effective glomerular span of GC-mediated inhibition.

542 Because there is very little chemotopic structure within the glomerular layer (59, 60,  
543 61, 62), it is possible for an individual GC to affect the firing patterns of principal cells re-  
544 sponding to a wide range of odorants. Inhibitory postsynaptic responses can trigger rebound  
545 spikes in MCs (63, 64, 65, 16), providing a potential mechanism to generate a cohesive neu-  
546 ral signal shaped by GC activity, consisting of coincident APs across a subpopulation of OB  
547 principal neurons that could then be detected in downstream piriform cortical neurons. Co-  
548 ordinated inhibition may also function to sculpt MC and TC firing patterns to enhance sub-  
549 tle differences evoked by sensory input, facilitating decorrelation of related odor responses  
550 (66, 67, 68, 69, 70). Since most MC/GC and TC/GC synaptic connections in the EPL are re-  
551 ciprocal (12, 71), our results suggest that individual GCs also receive excitatory input from  
552 a relatively large range of sensory neuron subtypes, helping to explain the complex sensory  
553 responses observed in GC recordings *in vivo* (72, 73, 67, 74, 75, 61, 38).



## 554 Figure Legends

555 **Figure 1: Inhibitory input to mitral and tufted cells.** A, Example records of sponta-  
556 neous IPSCs in ACSF (top), TTX (1  $\mu$ M; middle) and TTX + PE (phenylephrine; 10  $\mu$ M;  
557 bottom trace). Cartoon of recording configuration above traces. Vertical lines indicate  
558 automatically-detected IPSC onset times. B, Example recording illustrating spontaneous  
559 IPSCs recorded in a tufted cell under the same conditions as A. C, Plot of reduction of mem-  
560 brane current noise (variance) by 10  $\mu$ M gabazine in 9 experiments (N = 5 MCs and 4 TCs).  
561 \*\*\* P = 0.003; paired t-test;  $t(8) = 4.2$ . Reduction in gabazine also statistically significant  
562 when MCs and TCs were analyzed separately (both P < 0.03). D, Plot of spontaneous IPSC  
563 rate in MCs (black bars) and TCs (grey bars) in ACSF, TTX, and TTX + PE. TC/MC com-  
564 parisons \*\*\* P =  $7.6 \times 10^{-6}$  (ACSF; unpaired t-test;  $t(224) = 4.58$ ), P =  $1.99 \times 10^{-4}$  (TTX;  
565  $t(110) = 3.85$ ), P =  $6.11 \times 10^{-5}$  (TTX + PE;  $t(110) = 4.17$ ). Within each cell type, IPSC  
566 rates were lower in TTX than ACSF (both P < 0.002; paired t-test) but not different be-  
567 tween ACSF and TTX + PE conditions (MCs: P = 0.54, TCs: P = 0.80). E, Plot of ratio of  
568 IPSC rates in MCs and TCs under the same three conditions. F, Plot of mean IPSC amplitude  
569 in MCs and TCs. \*\* P = 0.0022 (ACSF; unpaired t-test;  $t(224) = 3.10$ ), P = 0.0015 (TTX;  
570  $t(110) = 3.26$ ), TTX + PE: N.S. P = 0.073. Mean IPSC amplitude also was different be-  
571 tween ACSF and TTX conditions in MCs (unpaired t-test; P =  $1.8 \times 10^{-4}$ ;  $t(290) = 3.8$ ) and  
572 TCs (P = 0.043;  $t(44) = 2.1$ ) but not between ACSF and TTX + PE conditions (MCs: P =  
573 0.67; TCs P = 0.71). G, Plot of mean IPSC rise times in the same conditions (P > 0.05 in  
574 all comparisons between conditions and between MCs and TCs in the same condition). H,  
575 Histogram of percentage of TTX-sensitive (spike-driven) IPSCs compared to the IPSC rate in  
576 ACSF in 68 MCs and 22 TCs. Arrows indicate population means (MCs: 69.6%; TCs: 61.1%).  
577 I, Plot of the relation between miniature (TTX-resistant) and spontaneous IPSC rates in 68  
578 MCs (Pearson correlation R = 0.59; P =  $1 \times 10^{-7}$ ). J, Similar plot for 24 TCs (R = 0.25; P =  
579 0.25). In all subsequent figures \* P < 0.05; \*\* P < 0.01; \*\*\* P < 0.005.

580 **Figure 2: Coincident inhibitory input onto mitral cells** A, Diagram of dual MC  
581 recording configuration. B, Example simultaneous intracellular recording from two MCs.  
582 Near-coincident IPSPs (onset lags: -0.1, -0.1 and -0.1 ms) marked by red vertical lines; other  
583 automatically detected IPSCs indicated by black lines. C, 2-photon reconstruction of the  
584 two MCs shown in B. Both MCs had apical dendrites that were truncated (red arrowheads)  
585 before reaching the glomerular layer. D, Plot of cross-correlation of actual (left) and trial  
586 shuffled (right; mean of 100 runs) IPSCs times in experiment shown in B. Grey traces show  
587 chance rate of near-coincident IPSCs estimated from interval permutation in both data sets  
588 (actual and trial shuffled; plot represents mean of 100 interval permutation runs). E, Plot of  
589 the relationship between degree of inhibitory synchrony between MC/MC pairs estimated  
590 from the cross correlation method shown in D (the *dual randomization P value* described in  
591 the Methods) and the clipped cross intensity function (CIF). Probability of near-coincident

592 inhibition increases with higher numbers (axes reflect  $-1 * \text{natural log}(P \text{ value})$ ). Red sym-  
593 bols reflect  $P < 0.015$  ( $4.2 = -1 * \ln(0.015)$ ). Multiple experiments with similar P values  
594 indicated by “(n)”. F, Histogram of IPSC lag corresponding to maximal cross correlation  
595 in 16 MC/MC paired recordings with statistically significant inhibitory synchrony (0.4 ms  
596 bins). G, Comparison of mean IPSC rates in MC/MC pairs with (red) and without (black)  
597 inhibitory synchrony ( $P = 0.94$ ; unpaired t-test).

598 **Figure 3: Spatial scale of coincident inhibition among mitral cells** A, Diagram of  
599 dual MC recording configuration. B, Plot of the probability of inhibitory coincidence versus  
600 separation between MC somata in 89 experiments from actual IPSC timing (left) and follow-  
601 ing trial shuffling (right). Red symbols indicate  $P < 0.015$  ( $> 4.2$  on  $-1 * \ln(P)$  axis; dashed  
602 line). Cluster of red dots (marked “(8)”) in left plot corresponds to 8 experiments with simi-  
603 lar P values.

604 **Figure 4: Coincident inhibition in mitral cells belong to different glomeruli** A, Dia-  
605 gram of recording configuration. B, Example recording from two MCs with near-coincident  
606 IPSCs (onset lags: -0.1, -0.6 and -0.2 ms). C, 2-photon reconstruction of the two MCs shown  
607 in B. The apical dendrites terminated in different glomeruli separated by  $130 \mu\text{m}$  (indicated  
608 by blue circles). D, Plot of cross correlation in the MC/MC pair shown in B-C based on ac-  
609 tual (left) and trial shuffled (right; mean of 100 trial shuffling runs) IPSC onset times. Grey  
610 traces show the shift predictor estimated from interval permutation (100 interval permuta-  
611 tion runs).

612 **Figure 5: Coincident inhibition in mitral/tufted cell paired recordings** A, Diagram  
613 of recording configuration. B, Simultaneous MC (top trace) and TC (bottom) recording  
614 showing near-coincident IPSCs (onset lags: -0.1 and -0.9 ms). C, Plot of the relationship  
615 between the degree of inhibitory synchrony and somatic separation in 24 MC/TC paired  
616 recordings based on the actual (left) and trial shuffled (right) IPSC onset times. Three exper-  
617 iments with statistically significant inhibitory synchrony ( $P < 0.015$ ; dashed lines) denoted  
618 by red symbols. X axis reflects only the component of the somatic separation along the MCL.  
619 D, Plot of the degree of inhibitory synchrony in MC/MC paired recordings assayed in ACSF  
620 ( $N = 89$ ), TTX ( $N = 43$ ) and TTX + PE ( $N = 43$ ). Experiments with statistically significant in-  
621 hibitory synchrony ( $P < 0.015$ ; dashed line) denoted by red symbols. E, Similar plot for  
622 MC/TC paired recordings ( $N = 24$  experiments in ACSF,  $N = 22$  in TTX and TTX + PE).

623 **Figure 6: Passive depolarization with elevated  $K^+$  increases inhibitory synchrony**  
624 A, Example dual MC recording with near coincident IPSCs (onset lags: -0.4, -0.4, -0.3 and  
625 0.1 ms) in high K ACSF but not in control ACSF. B, Plot of degree of inhibitory synchrony  
626 in 19 paired MC recordings tested in control and high K ACSF (P values based on actual  
627 IPSC onset times shown in left panel and following trial shuffling on right). Experiments  
628 with statistically significant inhibitory synchrony in high K ACSF indicated by red lines (7

629 experiments with  $P < 0.015$  only in high K ACSF and 2 experiments with  $P < 0.015$  in  
630 both conditions). C, Plot of mean IPSC rate in following passive depolarization using high  
631 K ACSF. \*\*\* (ACSF vs. high K ACSF:  $P = 0.0001$ ,  $t(37) = 4.35$ , paired t-test; high K vs. high  
632 K + PE:  $P = 0.00044$ ,  $t(56) = 3.74$ ; unpaired t-test; high K to high K + TTX:  $P = 0.00011$ ,  
633  $t(54) = 4.17$ , unpaired t-test). D, Plot of the degree of inhibitory synchrony in MC/MC  
634 paired recordings following passive depolarization with high K ACSF. Dashed line repre-  
635 sents same  $P = 0.015$  threshold for statistical significance used throughout study. Cluster  
636 of 5 experiments with similar P values indicated by “(5)”. E, Plot of mean IPSC amplitude  
637 following passive depolarization. \*\*\*  $P = 0.0035$  ( $t(19) = 3.11$ , paired t-test) F, Plot of  
638 degree of inhibitory synchrony versus the lower cutoff of IPSC amplitudes analyzed in one  
639 MC/MC paired recording in high K + PE. Far right point represents results of cross corre-  
640 lation analysis including only IPSCs  $> 50$  pA in both MCs while far left point reflects the  
641 cross correlation analysis when including all detected IPSCs. This paired recording showed  
642 statistically significant inhibitory synchrony in high K ACSF (red arrow by top of Y axis)  
643 Inset, histogram of IPSC amplitudes in this example paired recording in high K (red;  $N =$   
644  $5419$  IPSCs) and high K + PE (blue;  $N = 18588$  IPSCs) conditions. G, Plot of the degree  
645 of inhibitory coincidence following passive depolarization with high K ACSF, Middle col-  
646 umn represents experiments in high K + PE when all IPSCs are included while right column  
647 represents high K + PE when only IPSCs  $> 50$  pA are included. Dashed line at  $P = 0.015$ .

648 **Figure 7: Passive depolarization expands spatial scale of coincident inhibition**

649 A, Plot of the relationship between degree of inhibitory coincidence and somatic separa-  
650 tion in 19 MC/MC paired recordings based on actual (left) and trial shuffled (right) IPSC  
651 onset times. Two experiments with similar P values indicated by “(2)” in left plot. Dashed  
652 line at  $P = 0.015$ . B, Comparison of the fraction of MC/MC paired recording experiments  
653 with statistically significant inhibitory synchrony ( $P < 0.015$ ) in control (green bars) and  
654 high K ACSF (black). Left bars represent all MC/MC paired recording experiments while  
655 right pair of bars represents only experiments where MC cell bodies were separated by  $>$   
656  $100 \mu\text{m}$ . C, Plot of cumulative distribution of MC somatic separations in control (green)  
657 and high K ACSF (black). Plots on left restricted to MC/MC paired recordings with statis-  
658 tically significant inhibitory synchrony ( $N = 16$  ACSF and 9 high K; curves different,  $P =$   
659  $0.0486$ ,  $D(19,19) = 0.421$ , K-S test) while plot on right reflects all MC/MC experiments ( $N =$   
660  $89$  ACSF and 19 high K). Arrowheads by X axis in left plot indicate MC somatic separation  
661 cutoffs that include half of the relevant population (analogous to EC50 estimates). D, Plot  
662 of percent of all IPSCs that reflect “excess” coincident IPSCs (beyond the fraction of near-  
663 coincident IPSCs (onset lag  $< 3$  ms) expected by chance) in experiments with statistically  
664 significant inhibitory synchrony (red bars), experiments without demonstrable inhibitory  
665 synchrony (black bars) and in all MC/MC paired recordings following trial shuffling (grey  
666 bars). All comparisons between bar pairs did not differ significantly (all  $P > 0.05$ , un-

667 paired t-test). Cartoon of expected fan-out from individual bulbar interneurons (example GC  
668 illustrated). See *Discussion* for details.

## 669 References

- 670 1. Stopfer, M., Bhagavan, S., Smith, B. H. & Laurent, G. Impaired odour discrimination on  
671 desynchronization of odour-encoding neural assemblies. *Nature* **390**, 70–4 (1997).
- 672 2. Abraham, N. M. *et al.* Synaptic inhibition in the olfactory bulb accelerates odor discrimi-  
673 nation in mice. *Neuron* **65**, 399–411 (2010).
- 674 3. Gao, Y. & Strowbridge, B. W. Long-term plasticity of excitatory inputs to granule cells in  
675 the rat olfactory bulb. *Nat Neurosci* **12**, 731–3 (2009).
- 676 4. Nissant, A., Bardy, C., Katagiri, H., Murray, K. & Lledo, P.-M. Adult neurogenesis pro-  
677 motes synaptic plasticity in the olfactory bulb. *Nat Neurosci* **12**, 728–30 (2009).
- 678 5. Luskin, M. B. & Price, J. L. The topographic organization of associational fibers of the ol-  
679 factory system in the rat, including centrifugal fibers to the olfactory bulb. *J Comp Neurol*  
680 **216**, 264–91 (1983).
- 681 6. Davis, B. J. & Macrides, F. The organization of centrifugal projections from the anterior  
682 olfactory nucleus, ventral hippocampal rudiment, and piriform cortex to the main olfactory  
683 bulb in the hamster: An autoradiographic study. *J Comp Neurol* **203**, 475–93 (1981).
- 684 7. Egger, V., Svoboda, K. & Mainen, Z. F. Mechanisms of lateral inhibition in the olfactory  
685 bulb: Efficiency and modulation of spike-evoked calcium influx into granule cells. *J Neu-*  
686 *rosci* **23**, 7551–8 (2003).
- 687 8. Egger, V., Svoboda, K. & Mainen, Z. F. Dendrodendritic synaptic signals in olfactory bulb  
688 granule cells: Local spine boost and global low-threshold spike. *J Neurosci* **25**, 3521–30  
689 (2005).
- 690 9. Zelles, T., Boyd, J. D., Hardy, A. B. & Delaney, K. R. Branch-specific  $Ca^{2+}$  influx from  
691  $Na^{+}$ -dependent dendritic spikes in olfactory granule cells. *J Neurosci* **26**, 30–40 (2006).
- 692 10. Bywalez, W. G. *et al.* Local postsynaptic voltage-gated sodium channel activation in den-  
693 dritic spines of olfactory bulb granule cells. *Neuron* **85**, 590–601 (2015).
- 694 11. Brea, J. N., Kay, L. M. & Kopell, N. J. Biophysical model for gamma rhythms in the olfac-  
695 tory bulb via subthreshold oscillations. *Proc Natl Acad Sci U S A* **106**, 21954–9 (2009).
- 696 12. Isaacson, J. S. & Strowbridge, B. W. Olfactory reciprocal synapses: Dendritic signaling in  
697 the CNS. *Neuron* **20**, 749–61 (1998).
- 698 13. Wienisch, M. & Murthy, V. N. Population imaging at subcellular resolution supports spe-  
699 cific and local inhibition by granule cells in the olfactory bulb. *Sci Rep* **6**, 29308 (2016).
- 700 14. Lagier, S., Carleton, A. & Lledo, P.-M. Interplay between local GABAergic interneurons  
701 and relay neurons generates gamma oscillations in the rat olfactory bulb. *J Neurosci* **24**,

- 702 4382–92 (2004).
- 703 15. Pinching, A. J. & Powell, T. P. The neuropil of the glomeruli of the olfactory bulb. *J Cell*  
704 *Sci* **9**, 347–77 (1971).
- 705 16. Schoppa, N. E. Synchronization of olfactory bulb mitral cells by precisely timed in-  
706 hibitory inputs. *Neuron* **49**, 271–83 (2006).
- 707 17. Schmidt, L. J. & Strowbridge, B. W. Modulation of olfactory bulb network activity by  
708 serotonin: Synchronous inhibition of mitral cells mediated by spatially localized gabaergic  
709 microcircuits. *Learn Mem* **21**, 406–16 (2014).
- 710 18. McLennan, H. The pharmacology of inhibition of mitral cells in the olfactory bulb. *Brain*  
711 *Res* **29**, 177–84 (1971).
- 712 19. Salmoiraghi, G. C., Bloom, F. E. & Costa, E. Adrenergic mechanisms in rabbit olfactory  
713 bulb. *Am J Physiol* **207**, 1417–24 (1964).
- 714 20. Araneda, R. C. & Firestein, S. Adrenergic enhancement of inhibitory transmission in the  
715 accessory olfactory bulb. *J Neurosci* **26**, 3292–8 (2006).
- 716 21. Zimnik, N. C., Treadway, T., Smith, R. S. & Araneda, R. C.  $\alpha$ (1A)-adrenergic regulation  
717 of inhibition in the olfactory bulb. *J Physiol* **591**, 1631–43 (2013).
- 718 22. Balu, R., Pressler, R. T. & Strowbridge, B. W. Multiple modes of synaptic excitation of  
719 olfactory bulb granule cells. *J. Neurosci.* **27**, 5621–5632 (2007).
- 720 23. Pressler, R. T., Rozman, P. A. & Strowbridge, B. W. Voltage-dependent intrinsic bursting  
721 in olfactory bulb Golgi cells. *Learn. Mem.* **20**, 459–466 (2013).
- 722 24. Gao, Y. & Strowbridge, B. W. Long-term plasticity of excitatory inputs to granule cells in  
723 the rat olfactory bulb. *Nat. Neurosci.* **12**, 731–733 (2009).
- 724 25. Pressler, R. T. & Strowbridge, B. W. Blanes cells mediate persistent feedforward inhibi-  
725 tion onto granule cells in the olfactory bulb. *Neuron* **49**, 889–904 (2006).
- 726 26. Schmidt, L. J. & Strowbridge, B. W. Modulation of olfactory bulb network activity by  
727 serotonin: synchronous inhibition of mitral cells mediated by spatially localized GABAergic  
728 microcircuits. *Learn. Mem.* **21**, 406–416 (2014).
- 729 27. Larimer, P. & Strowbridge, B. W. Nonrandom local circuits in the dentate gyrus. *J Neu-*  
730 *rosci* **28**, 12212–23 (2008).
- 731 28. Larimer, P. & Strowbridge, B. W. Representing information in cell assemblies: Persistent  
732 activity mediated by semilunar granule cells. *Nat Neurosci* **13**, 213–22 (2010).
- 733 29. Hyde, R. A. & Strowbridge, B. W. Mnemonic representations of transient stimuli and  
734 temporal sequences in the rodent hippocampus in vitro. *Nat. Neurosci.* **15**, 1430–1438

- 735 (2012).
- 736 30. Gelman, A., Hill, J. & Yajima, M. Why we (usually) don't have to worry about multiple  
737 comparisons. *Journal of Research on Educational Effectiveness* **5**, 189–211 (2012).
- 738 31. Sham, P. C. & Purcell, S. M. Statistical power and significance testing in large-scale ge-  
739 netic studies. *Nat Rev Genet* **15**, 335–46 (2014).
- 740 32. Westfall, P. H. On using the bootstrap for multiple comparisons. *J Biopharm Stat* **21**,  
741 1187–205 (2011).
- 742 33. Westfall, P. H. & Young, S. S. *Resampling-based multiple testing: Examples and methods for*  
743 *p-value adjustment*. **279**, (John Wiley & Sons, 1993).
- 744 34. Narayanan, N. S. & Laubach, M. Methods for studying functional interactions among  
745 neuronal populations. *Methods Mol Biol* **489**, 135–65 (2009).
- 746 35. Hahnloser, R. H. Cross-intensity functions and the estimate of spike-time jitter. *Biol Cy-*  
747 *bern* **96**, 497–506 (2007).
- 748 36. Price, J. L. & Powell, T. P. The morphology of the granule cells of the olfactory bulb. *J*  
749 *Cell Sci* **7**, 91–123 (1970).
- 750 37. Burton, S. D. & Urban, N. N. Rapid feedforward inhibition and asynchronous excitation  
751 regulate granule cell activity in the mammalian main olfactory bulb. *J Neurosci* **35**, 14103–  
752 22 (2015).
- 753 38. Wellis, D. P. & Scott, J. W. Intracellular responses of identified rat olfactory bulb  
754 interneurons to electrical and odor stimulation. *J. Neurophysiol.* **64**, 932–947 (1990).
- 755 39. Woolf, T. B., Shepherd, G. M. & Greer, C. A. Local information processing in dendritic  
756 trees: Subsets of spines in granule cells of the mammalian olfactory bulb. *J Neurosci* **11**,  
757 1837–54 (1991).
- 758 40. Petreanu, L. & Alvarez-Buylla, A. Maturation and death of adult-born olfactory bulb  
759 granule neurons: Role of olfaction. *J Neurosci* **22**, 6106–13 (2002).
- 760 41. Tukker, J. J. *et al.* Distinct dendritic arborization and in vivo firing patterns of  
761 parvalbumin-expressing basket cells in the hippocampal area ca3. *J Neurosci* **33**, 6809–  
762 25 (2013).
- 763 42. Bosch de Aguilar, P. van den. Cellular mechanisms of conditioning and behavioral plas-  
764 ticity edited by c.D. woody, d.L. alkon and j.L. mcgaugh plenum press - new york and lon-  
765 don - 1988 - pp 537. *Behav Processes* **21**, 205–7 (1990).
- 766 43. Dhawale, A. K., Hagiwara, A., Bhalla, U. S., Murthy, V. N. & Albeanu, D. F. Non-  
767 redundant odor coding by sister mitral cells revealed by light addressable glomeruli in the

- 768 mouse. *Nat Neurosci* **13**, 1404–12 (2010).
- 769 44. Ke, M.-T., Fujimoto, S. & Imai, T. SeeDB: A simple and morphology-preserving optical  
770 clearing agent for neuronal circuit reconstruction. *Nat Neurosci* **16**, 1154–61 (2013).
- 771 45. Geramita, M. A., Burton, S. D. & Urban, N. N. Distinct lateral inhibitory circuits drive  
772 parallel processing of sensory information in the mammalian olfactory bulb. *Elife* **5**, (2016).
- 773 46. Mori, K., Kishi, K. & Ojima, H. Distribution of dendrites of mitral, displaced mitral,  
774 tufted, and granule cells in the rabbit olfactory bulb. *J Comp Neurol* **219**, 339–55 (1983).
- 775 47. Orona, E., Rainer, E. C. & Scott, J. W. Dendritic and axonal organization of mitral and  
776 tufted cells in the rat olfactory bulb. *J Comp Neurol* **226**, 346–56 (1984).
- 777 48. Ezeh, P. I., Wellis, D. P. & Scott, J. W. Organization of inhibition in the rat olfactory  
778 bulb external plexiform layer. *J Neurophysiol.* **70**, 263–274 (1993).
- 779 49. Lowe, G. Inhibition of backpropagating action potentials in mitral cell secondary den-  
780 drites. *J Neurophysiol* **88**, 64–85 (2002).
- 781 50. Orona, E., Scott, J. W. & Rainer, E. C. Different granule cell populations innervate super-  
782 ficial and deep regions of the external plexiform layer in rat olfactory bulb. *J Comp Neurol*  
783 **217**, 227–37 (1983).
- 784 51. Bartel, D. L., Rela, L., Hsieh, L. & Greer, C. A. Dendrodendritic synapses in the mouse  
785 olfactory bulb external plexiform layer. *J Comp Neurol* **523**, 1145–61 (2015).
- 786 52. Greer, C. A. Golgi analyses of dendritic organization among denervated olfactory bulb  
787 granule cells. *J Comp Neurol* **257**, 442–52 (1987).
- 788 53. Burton, S. D. & Urban, N. N. Rapid Feedforward Inhibition and Asynchronous Excita-  
789 tion Regulate Granule Cell Activity in the Mammalian Main Olfactory Bulb. *J. Neurosci.* **35**,  
790 14103–14122 (2015).
- 791 54. Burton, S. D., LaRocca, G., Liu, A., Cheetham, C. E. & Urban, N. N. Olfactory bulb deep  
792 short-axon cells mediate widespread inhibition of tufted cell apical dendrites. *J. Neurosci.*  
793 (2016).
- 794 55. Kato, H. K., Gillet, S. N., Peters, A. J., Isaacson, J. S. & Komiyama, T. Parvalbumin-  
795 expressing interneurons linearly control olfactory bulb output. *Neuron* **80**, 1218–1231  
796 (2013).
- 797 56. Egger, V., Svoboda, K. & Mainen, Z. F. Mechanisms of lateral inhibition in the olfactory  
798 bulb: efficiency and modulation of spike-evoked calcium influx into granule cells. *J. Neu-  
799 rosci.* **23**, 7551–7558 (2003).
- 800 57. Brea, J. N., Kay, L. M. & Kopell, N. J. Biophysical model for gamma rhythms in the ol-  
801 factory bulb via subthreshold oscillations. *Proc. Natl. Acad. Sci. U.S.A.* **106**, 21954–21959



- 802 (2009).
- 803 58. Isaacson, J. S. & Strowbridge, B. W. Olfactory reciprocal synapses: dendritic signaling in  
804 the CNS. *Neuron* **20**, 749–761 (1998).
- 805 59. Soucy, E. R., Albeanu, D. F., Fantana, A. L., Murthy, V. N. & Meister, M. Precision and  
806 diversity in an odor map on the olfactory bulb. *Nat. Neurosci.* **12**, 210–220 (2009).
- 807 60. Fantana, A. L., Soucy, E. R. & Meister, M. Rat olfactory bulb mitral cells receive sparse  
808 glomerular inputs. *Neuron* **59**, 802–814 (2008).
- 809 61. Luo, M. & Katz, L. C. Response correlation maps of neurons in the mammalian olfactory  
810 bulb. *Neuron* **32**, 1165–1179 (2001).
- 811 62. Ma, L. *et al.* Distributed representation of chemical features and tunotopic organiza-  
812 tion of glomeruli in the mouse olfactory bulb. *Proc. Natl. Acad. Sci. U.S.A.* **109**, 5481–5486  
813 (2012).
- 814 63. Balu, R. & Strowbridge, B. W. Opposing inward and outward conductances regulate re-  
815 bound discharges in olfactory mitral cells. *J. Neurophysiol.* **97**, 1959–1968 (2007).
- 816 64. Desmaisons, D., Vincent, J. D. & Lledo, P. M. Control of action potential timing by in-  
817 trinsic subthreshold oscillations in olfactory bulb output neurons. *J. Neurosci.* **19**, 10727–  
818 10737 (1999).
- 819 65. Galán, R. F., Fourcaud-Trocmé, N., Ermentrout, G. B. & Urban, N. N. Correlation-  
820 induced synchronization of oscillations in olfactory bulb neurons. *J Neurosci* **26**, 3646–55  
821 (2006).
- 822 66. Friedrich, R. W. & Laurent, G. Dynamic optimization of odor representations by slow  
823 temporal patterning of mitral cell activity. *Science* **291**, 889–94 (2001).
- 824 67. Cazakoff, B. N., Lau, B. Y., Crump, K. L., Demmer, H. S. & Shea, S. D. Broadly tuned and  
825 respiration-independent inhibition in the olfactory bulb of awake mice. *Nat. Neurosci.* **17**,  
826 569–576 (2014).
- 827 68. Shepherd, G. M., Chen, W. R., Willhite, D., Migliore, M. & Greer, C. A. The olfactory  
828 granule cell: From classical enigma to central role in olfactory processing. *Brain Res Rev* **55**,  
829 373–82 (2007).
- 830 69. Friedrich, R. W. & Wiechert, M. T. Neuronal circuits and computations: Pattern decorre-  
831 lation in the olfactory bulb. *FEBS Lett* **588**, 2504–13 (2014).
- 832 70. Gschwend, O. *et al.* Neuronal pattern separation in the olfactory bulb improves odor dis-  
833 crimination learning. *Nat Neurosci* **18**, 1474–82 (2015).
- 834 71. Rall, W., Shepherd, G. M., Reese, T. S. & Brightman, M. W. Dendrodendritic synaptic

- 835 pathway for inhibition in the olfactory bulb. *Exp. Neurol.* **14**, 44–56 (1966).
- 836 72. Kato, H. K., Chu, M. W., Isaacson, J. S. & Komiyama, T. Dynamic sensory representa-  
837 tions in the olfactory bulb: Modulation by wakefulness and experience. *Neuron* **76**, 962–75  
838 (2012).
- 839 73. Fukunaga, I., Herb, J. T., Kollo, M., Boyden, E. S. & Schaefer, A. T. Independent con-  
840 trol of gamma and theta activity by distinct interneuron networks in the olfactory bulb. *Nat.*  
841 *Neurosci.* **17**, 1208–1216 (2014).
- 842 74. Cang, J. & Isaacson, J. S. In vivo whole-cell recording of odor-evoked synaptic transmis-  
843 sion in the rat olfactory bulb. *J. Neurosci.* **23**, 4108–4116 (2003).
- 844 75. Tan, J., Savigner, A., Ma, M. & Luo, M. Odor information processing by the olfactory  
845 bulb analyzed in gene-targeted mice. *Neuron* **65**, 912–926 (2010).

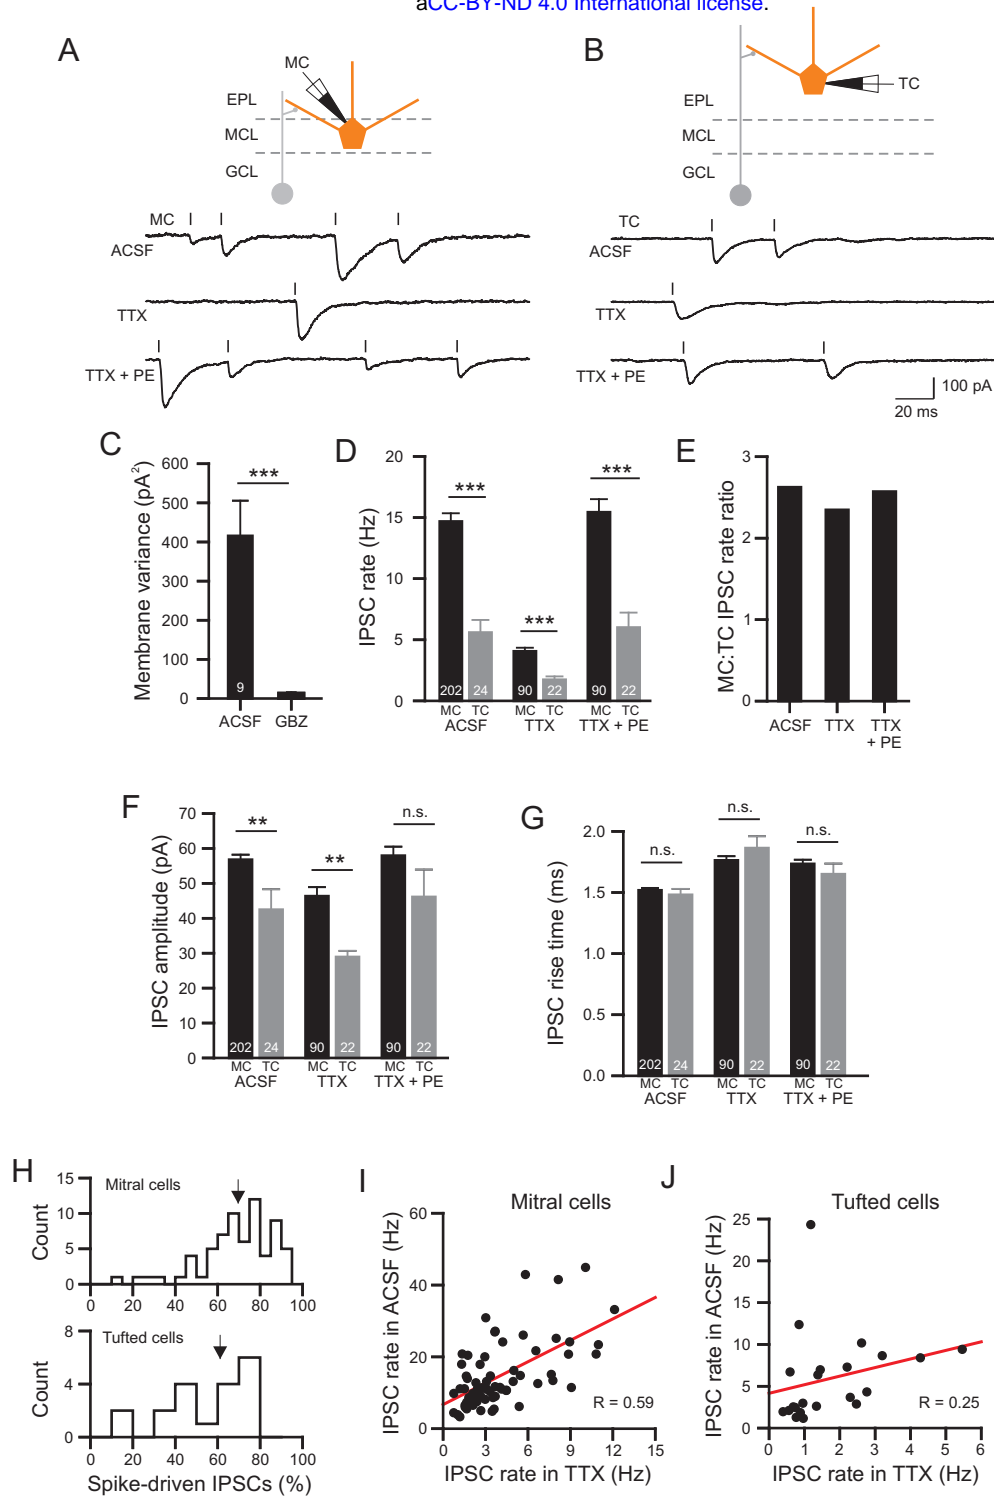

Figure 1

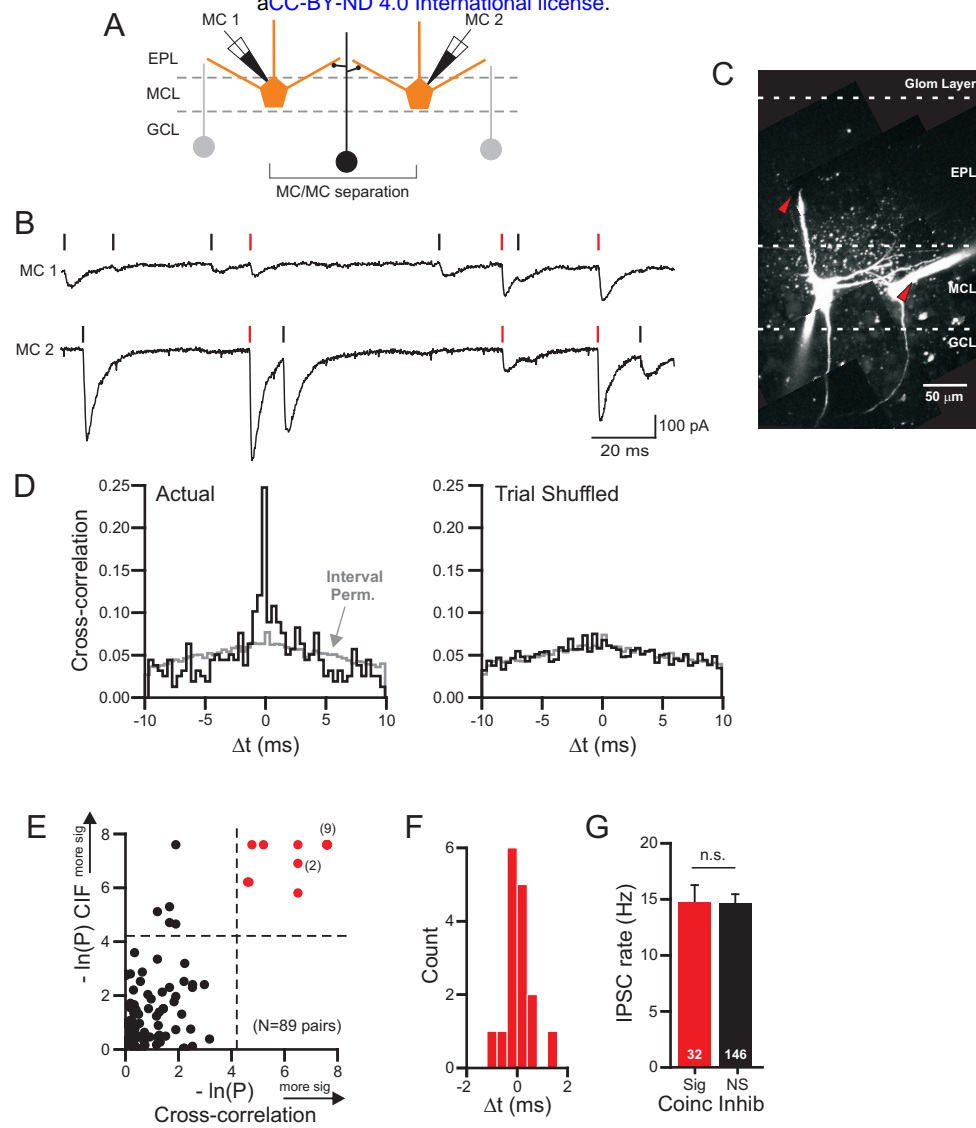

Figure 2

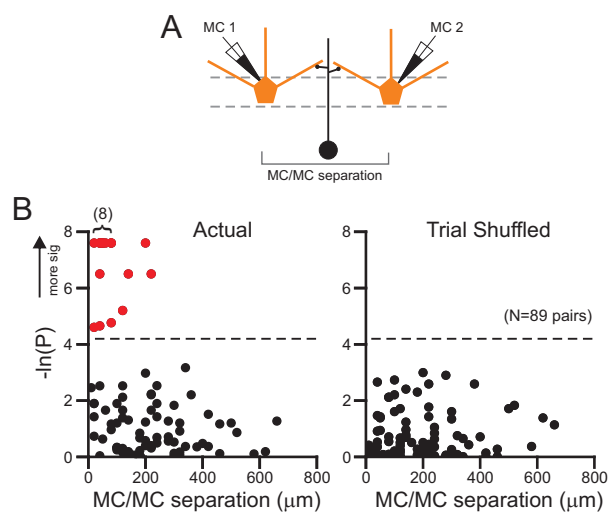

Figure 3

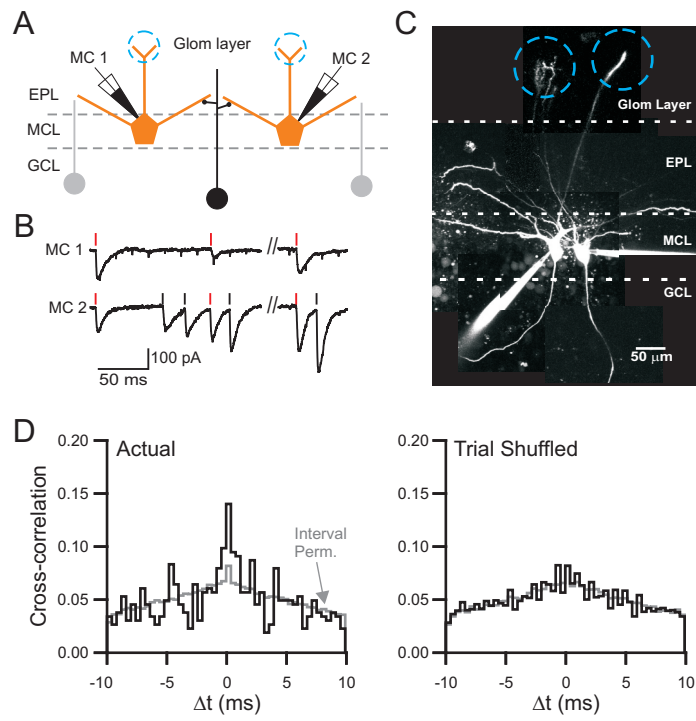

Figure 4

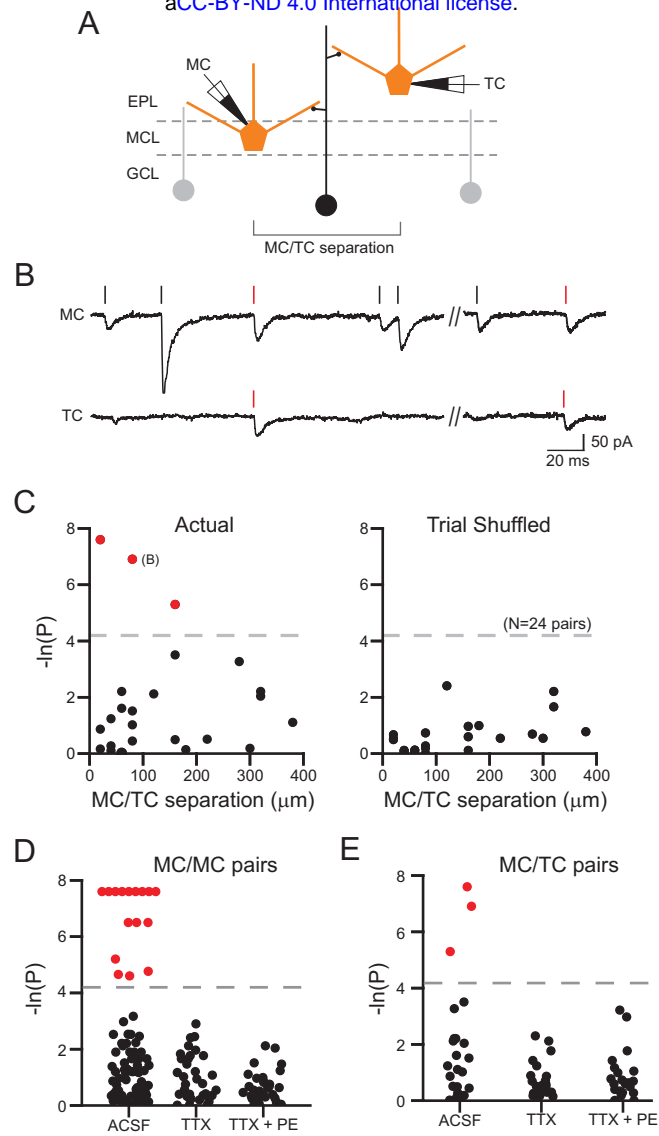

Figure 5

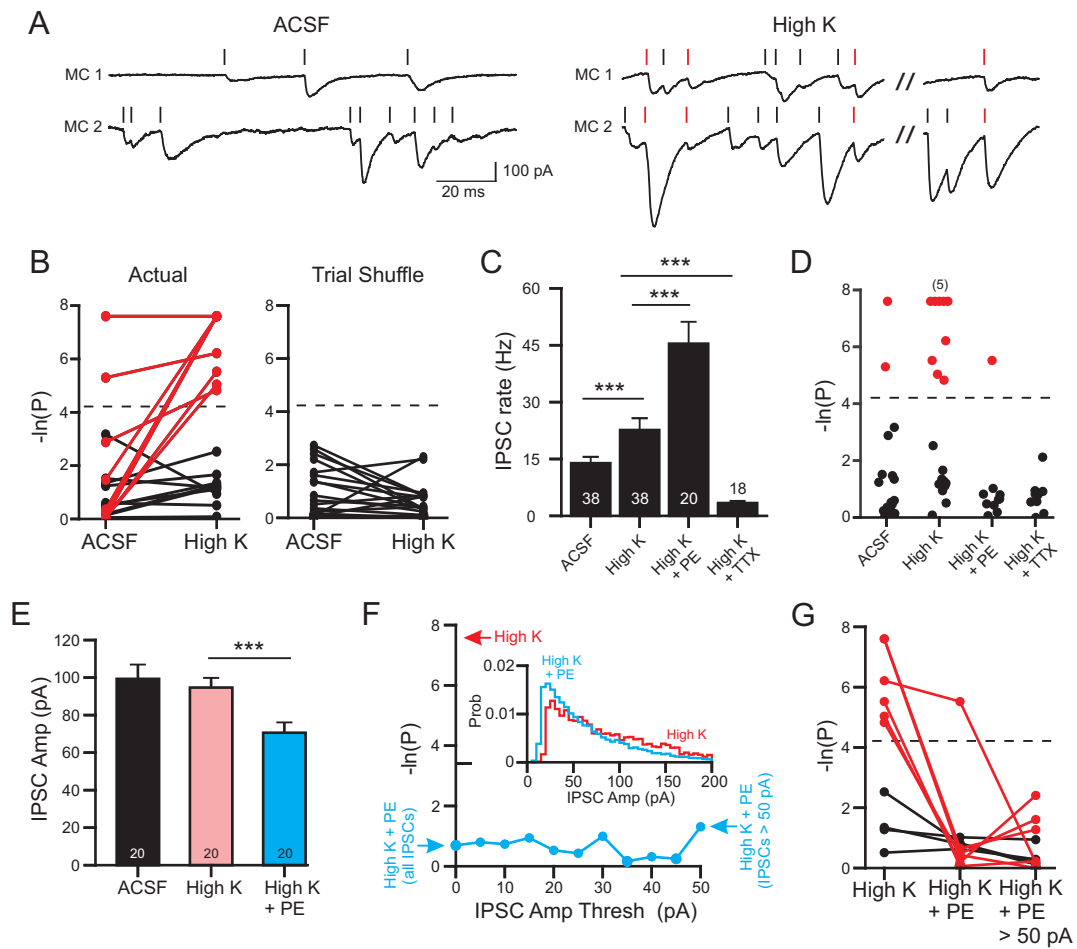

Figure 6



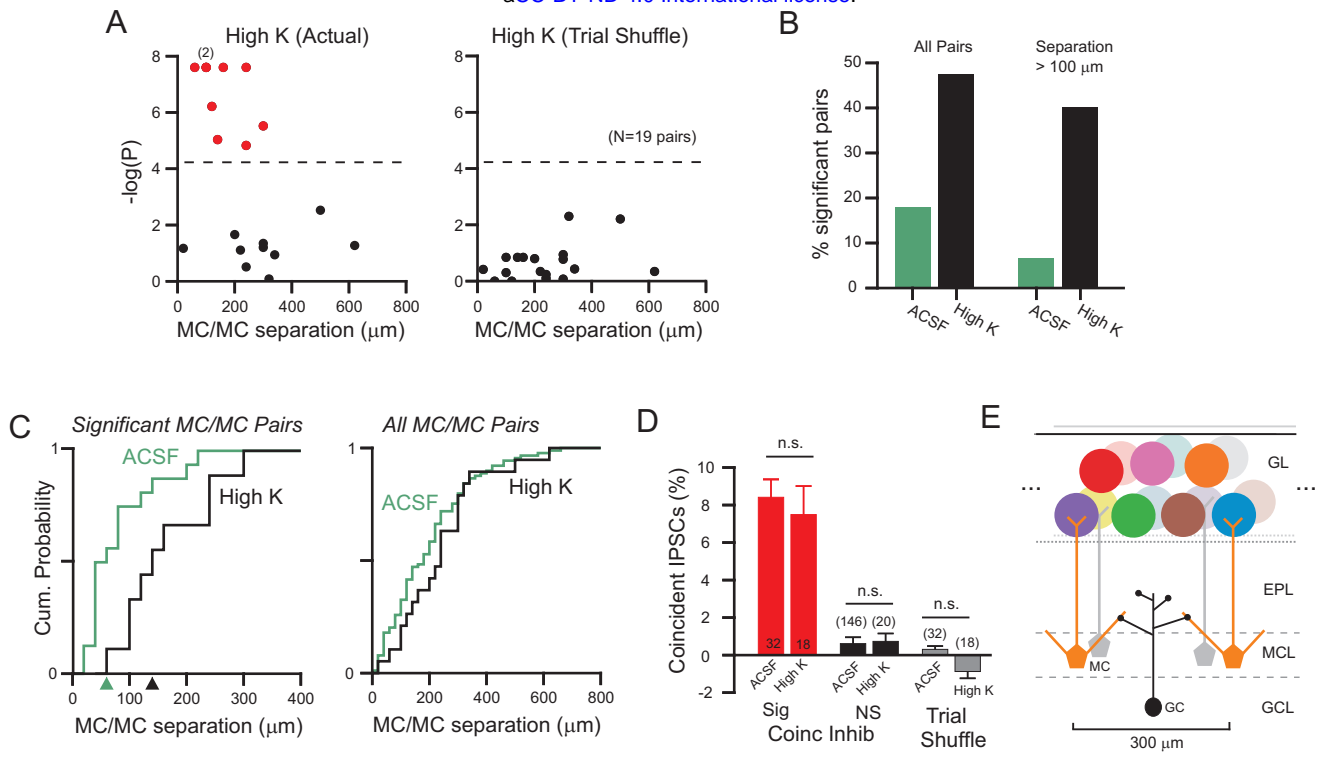

Figure 7
